# Supplementary material for: Temperature Affects the Tripartite Interactions between Bacteriophage WO, Wolbachia, and Cytoplasmic Incompatibility
Source: PLoS One. 2011 Dec 15;6(12):e29106. doi: 10.1371/journal.pone.0029106 (PMC3240643; doi:10.1371/journal.pone.0029106)
Supplement: Table S1 — Absolute Copy Numbers of NvS6K, groEL and ORF7 genes per N. vitripennis male. (XLS) [file pone.0029106.s001.xls]

## Sheet: Sheet1
				Starting Quantity
Experiment	ID	Temperature	Developmental Stage	NvS6K	groEL	ORF7
Cold	B1	25C	Control	71555.4	72049.9	206070
Cold	B5	25C	Control	115718	58020.8	220002
Cold	B6	25C	Control	53049.2	48654.2	140677
Cold	B7	25C	Control	66771.6	71776	230755
Cold	B9	25C	Control	45405.5	25840.2	76410.8
Cold	B11	25C	Control	210568	96623.2	286568
Cold	B13	25C	Control	87391.7	24804.7	71917.5
Cold	b15	25C	Control	24093.6	13788.7	43156.4
Cold	B16	25C	Control	33809.1	7274.76	19735.7
Cold	B18	25C	Control	55261	25868.3	68907.2
Cold	B21	25C	Control	58188.1	10410.8	29878.7
Cold	B22	25C	Control	57598	20448	63080
Cold	B24	25C	Control	32397.6	6479.69	20603
Cold	B25	25C	Control	477478	132296	400962
Cold	B28	25C	Control	621074	236192	775509
Cold	B30	25C	Control	63619.1	11728.1	36386.6
Cold	B32	25C	Control	55311.5	20431	60283.3
Cold	B33	25C	Control	139786	60038.4	192218
Cold	B34	25C	Control	62120.6	25437.3	67275.2
Cold	B36	25C	Control	36194	27022.9	75167.3
Cold	B37	25C	Control	458792	27144.6	77791.5
Cold	B38	25C	Control	42428	27133.4	78062.4
Cold	B39	25C	Control	63345	57057.5	182636
Cold	B40	25C	Control	210993	10793.1	31125.1
Cold	B43	25C	Control	75669.4	17525.7	47768.7
Cold	B44	25C	Control	77651.5	43948.5	127488
Cold	B45	25C	Control	10565	4387.15	12545.2
Cold	B46	25C	Control	57656.3	43856.9	128600
Cold	B47	25C	Control	20524.7	5788.37	17092.5
Cold	B49	25C	Control	37953.7	26092.3	66086.3
Cold	B50	25C	Control	50270.1	31116.8	110683
Cold	B52	25C	Control	45697.6	29687.8	88241.2
Cold	B55	25C	Control	63377.8	28469	76344.8
Cold	B56	25C	Control	27554.5	14637.8	44220.4
Cold	B59	25C	Control	57785.2	35606.7	105782
Cold	B60	25C	Control	50117.1	36496.2	99096.9
Cold	B63	25C	Control	21185.1	16816.4	49412.9
Cold	B66	25C	Control	38889.3	24684.5	65162.4
Cold	B67	25C	Control	41486.2	29989.7	99084.4
Cold	B68	25C	Control	73401.5	38381.5	116213
Cold	B69	25C	Control	32405.5	12260.5	31545.3
Cold	B70	25C	Control	46611.3	7639.34	25500
Cold	B73	25C	Control	17014	6403.26	18322
Cold	B74	25C	Control	47026	24561.4	70192.3
Cold	B75	25C	Control	28336.5	10724.7	31411.1
Cold	A1	18C	Egg	908243	359255	1.18736e+06
Cold	A2	18C	Egg	1.13509e+06	382333	1.15145e+06
Cold	A3	18C	Egg	662916	179522	558656
Cold	A4	18C	Egg	873883	202268	595804
Cold	A7	18C	Egg	717637	176987	558896
Cold	A41	18C	Larva	429939	45595.2	145733
Cold	A42	18C	Larva	751154	85632.6	264663
Cold	A43	18C	Larva	643522	58515.2	219006
Cold	A44	18C	Larva	711371	92264	272661
Cold	A45	18C	Larva	543497	52519.3	176309
Cold	A46	18C	Larva	672322	80125.7	232581
Cold	A47	18C	Larva	620588	57731.9	166437
Cold	A48	18C	Larva	790439	101970	293436
Cold	A49	18C	Larva	819731	112039	356794
Cold	A50	18C	Larva	646056	61952.9	201542
Cold	A51	18C	Larva	689219	85692.4	244545
Cold	A52	18C	Larva	655285	56961.8	198630
Cold	A54	18C	Larva	705711	50958.8	138724
Cold	A55	18C	Larva	715586	55969.7	177954
Cold	A56	18C	Larva	643545	109588	366541
Cold	A58	18C	Larva	868001	180872	590062
Cold	A59	18C	Larva	745314	226286	837686
Cold	A60	18C	Larva	746322	178390	574101
Cold	A61	18C	Larva	693550	93677.5	301506
Cold	A62	18C	Larva	773109	296253	959227
Cold	A64	18C	Larva	733263	229925	793979
Cold	A66	18C	Larva	619503	119276	410761
Cold	A67	18C	Larva	833346	195643	577070
Cold	a68	18C	Larva	1.09967e+06	120771	461172
Cold	A69	18C	Larva	578361	160872	522873
Cold	A72	18C	Larva	768729	273400	807952
Cold	A73	18C	Larva	566533	208335	573277
Cold	A75	18C	Larva	772819	273705	834632
Cold	A79	18C	Larva	1.10172e+06	187256	552019
Cold	A81	18C	Pupa	824579	58582.7	214322
Cold	A83	18C	Pupae	181652	13411.5	37884.4
Cold	A84	18C	Pupae	729346	30926	117534
Cold	A85	18C	Pupae	314549	30160.1	108004
Cold	A87	18C	Pupae	286573	218625	329457
Cold	A89	18C	Pupae	686963	160411	466980
Cold	A90	18C	Pupae	887700	108566	366255
Cold	a92	18C	Pupa	397916	51014.5	152955
Cold	a94	18C	Pupa	795839	145490	483226
Cold	A95	18C	Pupa	652176	22351.5	70619.8
Cold	A96	18C	Pupa	322725	35635.5	108297
Cold	A97	18C	Pupa	640887	47169.3	135374
Cold	A98	18C	Pupa	741429	77509	240310
Cold	A99	18C	Pupa	735549	93660.1	287310
Cold	A100	18C	Pupa	831176	115586	404253
Cold	A101	18C	Pupa	779576	51535.7	151744
Cold	A102	18C	Pupa	749750	114737	391832
Cold	A105	18C	Pupa	933455	171847	530279
Cold	A106	18C	Pupa	391902	93358.1	266606
Cold	a107	18C	Pupa	702825	27407.5	77286
Cold	A108	18C	Pupa	115286	25501.2	75412.1
Cold	A109	18C	Pupa	836450	70325.4	260633
Cold	A110	18C	Pupa	97025.7	23933.7	65222.7
Cold	A112	18C	Pupa	838033	113800	479669
Cold	A113	18C	Pupa	574161	163589	475985
Cold	A114	18C	Pupa	524118	160979	490510
Cold	A116	18C	Pupa	101223	30651.8	86112.3
Cold	A117	18C	Pupa	695633	119973	371280
Cold	A118	18C	Pupa	845574	232855	740640
Cold	A121	18C	Adult	858373	233722	826034
Cold	A122	18C	Adult	556066	36777.3	118753
Cold	A123	18C	Adult	679613	160718	514057
Cold	A124	18C	Adult	798934	238021	812445
Cold	A125	18C	Adult	789769	116565	417403
Cold	A126	18C	Adult	873655	175942	505019
Cold	A127	18C	Adult	969457	153543	449402
Cold	A128	18C	Adult	855243	125648	418616
Cold	A129	18C	Adult	528836	151391	488994
Cold	A130	18C	Adult	413613	52402.2	157149
Cold	A131	18C	Adult	911542	132316	429737
Cold	A132	18C	Adult	319684	38161	142819
Cold	A136	18C	Adult	252147	51150.6	145831
Cold	A137	18C	Adult	811634	192568	556702
Cold	A138	18C	Adult	766194	166370	514198
Cold	A139	18C	Adult	774543	157513	493143
Cold	A140	18C	Adult	546955	127271	404074
Cold	A141	18C	Adult	497592	111819	388002
Cold	A142	18C	Adult	582897	310969	797659
Cold	A143	18C	Adult	700311	298617	865165
Cold	A144	18C	Adult	902807	102766	919072
Cold	A145	18C	Adult	696981	247340	648413
Cold	A148	18C	Adult	834120	165504	487286
Cold	A149	18C	Adult	623833	32944.1	113246
Cold	A150	18C	Adult	673755	184641	549586
Cold	A151	18C	Adult	850121	382963	1.16412e+06
Cold	A152	18C	Adult	760462	234191	789704
Cold	A153	18C	Adult	785916	526596	1.70464e+06
Cold	A154	18C	Adult	565677	186112	532169
Heat	B201	25C	Control	1.15903e+07	3.7572e+06	1.38364e+07
Heat	B204	25C	Control	1.06979e+07	4.51595e+06	1.53799e+07
Heat	B205	25C	Control	3.67123e+06	2.12358e+06	7.48489e+06
Heat	B206	25C	Control	1.4177e+06	428724	1.78222e+06
Heat	B208	25C	Control	7.12658e+06	3.9034e+06	1.36788e+07
Heat	B210	25C	Control	3.92895e+06	566453	2.84997e+06
Heat	B211	25C	Control	4.55088e+06	2.1681e+06	7.67682e+06
Heat	B212	25C	Control	2.787e+06	992471	3.81646e+06
Heat	B215	25C	Control	9.54502e+06	1.69482e+06	9.23769e+06
Heat	B217	25C	Control	2.77111e+06	623763	3.174e+06
Heat	B218	25C	Control	2.2537e+06	513813	2.38716e+06
Heat	B219	25C	Control	2.63573e+06	1.02914e+06	3.69988e+06
Heat	B242	25C	Control	2.6786e+06	2.27418e+06	6.42113e+06
Heat	B244	25C	Control	1.82802e+06	1.13492e+06	3.67336e+06
Heat	B245	25C	Control	2.10009e+07	7.7327e+06	2.75449e+07
Heat	B246	25C	Control	2.1847e+07	1.47909e+07	5.04822e+07
Heat	B248	25C	Control	2.21837e+07	5.09335e+06	1.45833e+07
Heat	B250	25C	Control	3.08861e+07	5.5168e+06	2.01397e+07
Heat	B251	25C	Control	1.87416e+07	4.97107e+06	1.42018e+07
Heat	B252	25C	Control	1.28749e+07	4.8171e+06	1.35287e+07
Heat	B253	25C	Control	1.69723e+07	2.735e+06	9.87951e+06
Heat	B256	25C	Control	2.08701e+07	9.02383e+06	2.44551e+07
Heat	B258	25C	Control	2.02756e+07	8.02434e+06	2.51696e+07
Heat	B259	25C	Control	1.51563e+07	9.6642e+06	4.15703e+07
Heat	B260	25C	Control	1.74964e+07	2.63251e+06	7.23209e+06
Heat	B281	25C	Control	2.05867e+07	1.17859e+07	5.32879e+07
Heat	B283	25C	Control	2.24792e+07	1.82886e+07	5.11239e+07
Heat	B284	25C	Control	1.63857e+07	1.57839e+07	4.58961e+07
Heat	B285	25C	Control	2.04296e+07	1.07425e+07	3.91893e+07
Heat	B286	25C	Control	1.86405e+07	8.0996e+06	2.54632e+07
Heat	B289	25C	Control	7.51069e+06	4.36751e+06	1.18912e+07
Heat	B290	25C	Control	1.81743e+07	4.51902e+06	1.30904e+07
Heat	B296	25C	Control	1.8632e+07	3.90591e+06	1.28082e+07
Heat	B297	25C	Control	2.03235e+07	9.39891e+06	2.863e+07
Heat	B298	25C	Control	2.27774e+07	6.46988e+06	2.269e+07
Heat	B321	25C	Control	1.30818e+07	2.95491e+06	6.55481e+06
Heat	B322	25C	Control	1.08019e+07	2.85064e+06	4.79661e+06
Heat	B323	25C	Control	1.14692e+07	4.80162e+06	8.87649e+06
Heat	B324	25C	Control	1.39002e+07	2.99237e+06	5.66039e+06
Heat	B325	25C	Control	1.02443e+07	2.94629e+06	5.90972e+06
Heat	B327	25C	Control	2.70734e+06	1.65755e+06	3.83905e+06
Heat	B328	25C	Control	1.81993e+07	5.76647e+06	1.07976e+07
Heat	B329	25C	Control	1.65462e+07	5.45795e+06	1.02953e+07
Heat	B330	25C	Control	1.66439e+07	4.57014e+06	9.47641e+06
Heat	B331	25C	Control	1.64373e+07	8.01776e+06	1.35591e+07
Heat	B332	25C	Control	1.44962e+07	3.46939e+06	6.42598e+06
Heat	B334	25C	Control	2.10123e+07	4.5639e+06	1.41854e+07
Heat	B335	25C	Control	1.79726e+07	4.10126e+06	1.332e+07
Heat	B338	25C	Control	1.76498e+07	4.83694e+06	1.4949e+07
Heat	B339	25C	Control	4.20307e+06	505272	1.63208e+06
Heat	B340	25C	Control	1.99308e+07	2.3715e+06	7.23616e+06
Heat	C201	30C	Egg	7.81333e+06	10914.6	150627
Heat	C202	30C	Egg	7.40504e+06	2238.48	416695
Heat	C203	30C	Egg	3.00613e+06	2727.68	184119
Heat	C204	30C	Egg	3.12585e+06	1999.31	314242
Heat	C205	30C	Egg	5.58547e+06	21912.7	137579
Heat	C206	30C	Egg	1.49749e+06	89163.2	1.06891e+06
Heat	C208	30C	Egg	8.0583e+06	904375	3.17223e+06
Heat	C209	30C	Egg	9.49115e+06	1.22522e+06	3.75111e+06
Heat	C210	30C	Egg	1.14039e+07	1.97227e+06	9.05317e+06
Heat	C211	30C	Egg	7.09604e+06	944588	3.27191e+06
Heat	C212	30C	Egg	1.27218e+06	64529.3	827809
Heat	C213	30C	Egg	5.87839e+06	345172	1.19806e+06
Heat	C214	30C	Egg	1.34714e+06	31443.2	531579
Heat	C218	30C	Egg	907303	43258.8	319746
Heat	C219	30C	Egg	2.10162e+06	197779	890548
Heat	C220	30C	Egg	2.69248e+06	226379	1.34457e+06
Heat	C221	30C	Egg	4.64792e+06	75667.4	1.23101e+06
Heat	C222	30C	Egg	2.70259e+06	71309.9	991963
Heat	C223	30C	Egg	2.06865e+06	175820	675173
Heat	C224	30C	Egg	1.37601e+06	198008	908585
Heat	C225	30C	Egg	1.39718e+07	2.78265e+06	4.84846e+06
Heat	C226	30C	Egg	1.56367e+07	3.69167e+06	6.90241e+06
Heat	C228	30C	Egg	1.11383e+07	265553	714653
Heat	C229	30C	Egg	1.67341e+07	2.19847e+06	4.3101e+06
Heat	C230	30C	Egg	1.19184e+07	2.88637e+06	6.83633e+06
Heat	C231	30C	Egg	2.16163e+07	2.68674e+06	3.99738e+06
Heat	C232	30C	Egg	1.14687e+07	2.12071e+06	3.87572e+06
Heat	C233	30C	Egg	1.20446e+07	1.99307e+06	3.60759e+06
Heat	C234	30C	Egg	1.25861e+07	822747	1.87394e+06
Heat	C235	30C	Egg	1.85714e+07	1.40759e+06	4.51101e+06
Heat	C236	30C	Egg	1.46007e+07	2.06186e+06	4.21357e+06
Heat	C238	30C	Egg	1.46548e+07	2.71617e+06	6.19183e+06
Heat	C240	30C	Egg	1.14924e+07	2.05977e+06	3.63848e+06
Heat	C242	30C	Larva	2.74811e+06	626204	2.11424e+06
Heat	C245	30C	Larva	1.05579e+06	160342	617653
Heat	C246	30C	Larva	981958	396181	1.2433e+06
Heat	C247	30C	Larva	1.69764e+06	377170	1.27911e+06
Heat	C249	30C	Larva	1.40623e+06	269480	739624
Heat	C250	30C	Larva	1.97019e+06	393688	1.6698e+06
Heat	C251	30C	Larva	772841	148757	402956
Heat	C253	30C	Larva	1.04831e+07	2.47961e+06	3.8126e+06
Heat	C254	30C	Larva	1.19967e+07	3.88391e+06	6.92892e+06
Heat	C255	30C	Larva	1.34989e+07	8.74098e+06	1.41597e+07
Heat	C257	30C	Larva	1.12449e+07	3.82363e+06	6.89618e+06
Heat	C258	30C	Larva	1.41064e+07	5.03498e+06	7.69718e+06
Heat	C260	30C	Larva	1.62629e+07	4.43973e+06	5.92816e+06
Heat	C261	30C	Larva	1.65541e+07	2.49696e+06	7.09671e+06
Heat	C263	30C	Larva	1.66306e+07	3.17141e+06	9.55612e+06
Heat	C264	30C	Larva	1.29308e+07	2.29932e+06	6.58207e+06
Heat	C267	30C	Larva	1.11557e+07	1.7615e+06	5.43802e+06
Heat	C270	30C	Larva	1.07337e+07	2.78393e+06	8.29267e+06
Heat	C272	30C	Larva	1.04912e+07	1.43969e+06	3.82426e+06
Heat	C274	30C	Larva	1.49765e+07	7.88328e+06	2.29273e+07
Heat	C275	30C	Larva	1.01802e+07	3.82114e+06	1.10709e+07
Heat	C278	30C	Larva	1.71638e+07	5.26416e+06	1.49197e+07
Heat	C279	30C	Larva	1.59525e+07	5.57049e+06	1.84072e+07
Heat	C280	30C	Larva	1.84596e+07	8.88618e+06	2.62031e+07
Heat	C281	30C	Pupa	1.10031e+06	483002	1.18408e+06
Heat	C282	30C	Pupa	1.6139e+06	865939	2.2614e+06
Heat	C283	30C	Pupa	4.23427e+06	2.22192e+06	3.93292e+06
Heat	C286	30C	Pupa	8.89088e+06	2.64246e+06	6.65867e+06
Heat	C287	30C	Pupa	6.97849e+06	627897	1.86723e+06
Heat	C288	30C	Pupa	3.99562e+06	978643	3.18668e+06
Heat	C289	30C	Pupa	5.98076e+06	1.65471e+06	3.90319e+06
Heat	C291	30C	Pupa	1.64963e+06	385530	1.39914e+06
Heat	C292	30C	Pupa	711915	354837	449537
Heat	C293	30C	Pupa	600105	12752	135581
Heat	C294	30C	Pupa	1.42871e+06	368061	926665
Heat	C295	30C	Pupa	4.1477e+06	657486	1.62505e+06
Heat	C296	30C	Pupa	2.43065e+06	389316	1.51173e+06
Heat	C298	30C	Pupa	355046	258459	533519
Heat	C300	30C	Pupa	2.47876e+06	610169	1.88617e+06
Heat	C302	30C	Pupa	1.7371e+06	751708	2.16429e+06
Heat	C303	30C	Pupa	605278	174980	487137
Heat	C304	30C	Pupa	2.97241e+06	379932	2.28461e+06
Heat	C305	30C	Pupa	2.5397e+06	1.36269e+06	3.32705e+06
Heat	C307	30C	Pupa	1.78435e+07	9.2162e+06	2.14601e+07
Heat	C309	30C	Pupa	1.67726e+07	3.48045e+06	7.38595e+06
Heat	C311	30C	Pupa	1.26396e+07	2.5675e+06	6.36162e+06
Heat	C313	30C	Pupa	1.11863e+07	598560	1.49803e+06
Heat	C314	30C	Pupa	1.47176e+07	2.49647e+06	6.77095e+06
Heat	C315	30C	Pupa	1.96972e+07	773608	3.22013e+06
Heat	C318	30C	Pupa	1.74574e+07	2.10211e+07	7.52323e+07
Heat	C323	30C	Adult	1.96388e+07	1.13293e+07	3.85737e+07
Heat	C324	30C	Adult	2.24536e+07	6.30602e+06	2.86119e+07
Heat	C325	30C	Adult	2.13945e+07	9.31942e+06	4.1344e+07
Heat	C326	30C	Adult	1.59244e+07	4.39368e+06	1.47583e+07
Heat	C327	30C	Adult	2.03645e+07	5.87944e+06	2.34076e+07
Heat	C328	30C	Adult	2.09779e+07	6.86025e+06	2.49213e+07
Heat	C329	30C	Adult	2.34377e+07	8.44595e+06	2.67046e+07
Heat	C330	30C	Adult	1.99007e+07	6.89531e+06	2.18899e+07
Heat	C331	30C	Adult	2.06161e+07	5.57538e+06	2.24391e+07
Heat	C332	30C	Adult	2.02697e+07	2.86838e+06	1.03345e+07
Heat	C335	30C	Adult	2.05837e+07	2.16781e+06	7.34773e+06
Heat	C336	30C	Adult	2.11383e+07	4.03688e+06	1.28527e+07
Heat	C338	30C	Adult	2.49138e+07	1.06133e+07	4.13955e+07
Heat	C339	30C	Adult	2.33536e+07	5.67758e+06	2.23966e+07
Heat	C340	30C	Adult	2.57809e+07	1.6187e+07	5.51243e+07
Heat	C341	30C	Adult	7.87978e+06	1.34123e+06	3.8155e+06
Heat	C342	30C	Adult	1.95327e+07	1.41826e+07	4.73184e+07
Heat	C343	30C	Adult	1.92654e+07	1.02336e+07	3.34729e+07
Heat	C344	30C	Adult	1.75037e+07	4.55786e+06	1.39262e+07
Heat	C345	30C	Adult	1.81985e+07	1.18838e+07	3.81303e+07
Heat	C346	30C	Adult	1.22586e+07	798950	2.60741e+06
Heat	C348	30C	Adult	1.76305e+07	1.93668e+06	6.89486e+06
Heat	C350	30C	Adult	928184	152837	464220
Heat	C351	30C	Adult	542752	213269	646791
Heat	C352	30C	Adult	983043	366420	1.00857e+06
Heat	C355	30C	Adult	799591	326132	1.34331e+06
Heat	C356	30C	Adult	385486	112903	323423
Heat	C358	30C	Adult	548510	500936	1.46792e+06
Heat	C359	30C	Adult	1.4783e+06	609917	1.80208e+06
